# Supplementary material for: Quinolone-based fluorescent probes for distinguished detection of Cys and GSH through different fluorescence channels
Source: Royal Society of Chemistry journal article supplement (doi:10.1039/d0nj03274c), 2020-01-01

Electronic Supplementary Information (ESI) for

# Quinolone-based fluorescent probe for distinguishing detection of Cys and GSH through different fluorescence channels

Ying-Long Fu, Xiang-Gen Chen, Hao Li, Wei Feng and Qin-Hua Song\*

Department of Chemistry, University of Science and Technology of China, Hefei 230026, P. R. China

E-mail address: qhsong@ustc.edu.cn

## Contents:

|                                                                        |       |
|------------------------------------------------------------------------|-------|
| 1. Summary of coumarin-based fluorescent probes for biothiols.....     | S2-4  |
| 2. Spectral response of QB-1 and QB-2 toward thiols.....               | S5    |
| 3. Spectral response of QB-3 toward NAC.....                           | S6    |
| 4. Evidence of the sensing products for QB-3 with Cys/Hcy/GSH.....     | S6-7  |
| 5. The selectivity of QB-3 for ions.....                               | S7    |
| 6. Competitive reaction between two biothiols (Cys/GSH) with QB-3..... | S8    |
| 7. pH effects and cytotoxicity.....                                    | S8    |
| 8. Copies of NMR spectra for compounds.....                            | S9-13 |

**Table S1.** Summary of coumarin-based fluorescent probes for biothiols

| Probes                                                                              | Testing conditions                              | Absorption for probes<br>$\lambda_{\max}$ /nm | Distinguishing detection | Emission wavelength /nm | Response time /min | LOD / $\mu$ M        | References                              |
|-------------------------------------------------------------------------------------|-------------------------------------------------|-----------------------------------------------|--------------------------|-------------------------|--------------------|----------------------|-----------------------------------------|
| 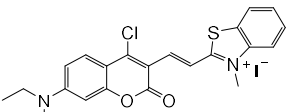   | PBS buffer (10 mM, pH 7.4, containing 1 Mm CTAB | 535                                           | Cys<br>GSH               | 420<br>512              | 60<br>60           | /<br>0.05            | J. Am. Chem. Soc. 2014, 136, 574-577    |
|    | PBS buffer solution (pH 7.4)                    | 457                                           | Cys<br>Hcy<br>GSH        | 470<br>470<br>546       | 34<br>60<br>40     | 0.18<br>0.09<br>0.08 | Anal. Chim. Acta 2015, 900, 103-110     |
|    | DMSO/PBS buffer (V/V: 1/1, 10 mM, pH 7.4)       | 448                                           | GSH                      | 505                     | 7                  | 0.30                 | Sens. Actuators, B 2017, 253, 42-49     |
|   | PBS (pH 7.4, 10 mM, containing 30% acetonitrile | 538                                           | Cys<br>GSH               | 500<br>560              | 60<br>60           | 0.19<br>0.43         | Biosens. Bioelectron. 2017, 90, 117-124 |
|  | PBS (pH 7.4, 10 mM, containing 20% DMSO         | 500                                           | Cys<br>Hcy               | 480<br>542              | 60<br>60           | 1.99<br>0.61         | Chem. Asian J. 2017, 12, 2098-2103      |

|                                                                                     |                                                         |     |                   |                                           |                |                            |                                           |
|-------------------------------------------------------------------------------------|---------------------------------------------------------|-----|-------------------|-------------------------------------------|----------------|----------------------------|-------------------------------------------|
| 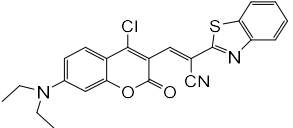   | DMSO/PBS (pH 7.4, 10 mM, v/v, 6/4)                      | 500 | Cys<br>Hcy<br>GSH | 457<br>559<br>529                         | 4<br>15<br>5   | 0.0005<br>0.0036<br>0.0069 | Angew. Chem. Int. Ed. 2018, 57, 4991-4994 |
|    | PBS (pH 7.4, 10 mM, containing 1% DMSO)                 | 614 | Cys<br>Hcy<br>GSH | 475<br>475<br>575                         | 25<br>55<br>50 | 0.014<br>0.081<br>0.097    | New J. Chem., 2018, 42, 12615-12620       |
|    | DMSO-PBS (pH 7.4, 10 mM, v/v, 4/6).                     | 527 | Cys<br>Hcy<br>GSH | 503<br>467<br>568                         | 15<br>15<br>15 | 0.0002<br>0.0007<br>0.001  | Angew. Chem. Int. Ed. 2019, 58, 4557-4561 |
|    | PBS (pH 7.4, 10 mM)/CH <sub>3</sub> OH = 1600/400 (v/v) | 578 | Cys<br>Hcy<br>GSH | 489,564,600<br>489,564,600<br>489,564,600 | 60<br>90<br>80 | 2.965<br>6.140<br>6.847    | Anal. Chem. 2019, 91, 1472-1478           |
|   | Phosphate-buffered saline (pH 7.4, 10 mM).              | 586 | Cys<br>Hcy<br>GSH | 498,573,612<br>498,573,612<br>498,573,612 | 60<br>90<br>70 | 2.2<br>2.08<br>1.89        | J. Mater. Chem. B, 2019, 7, 7723-7728     |
|  | 10 M PBS buffer pH 7.4, 40% CH <sub>3</sub> CN          | 573 | Cys<br>GSH        | 420<br>537                                | 25<br>40       | 0.17<br>0.46               | This work                                 |

“/” No available data.

## 2. Spectral response of QB-1 and QB-2 toward thiols

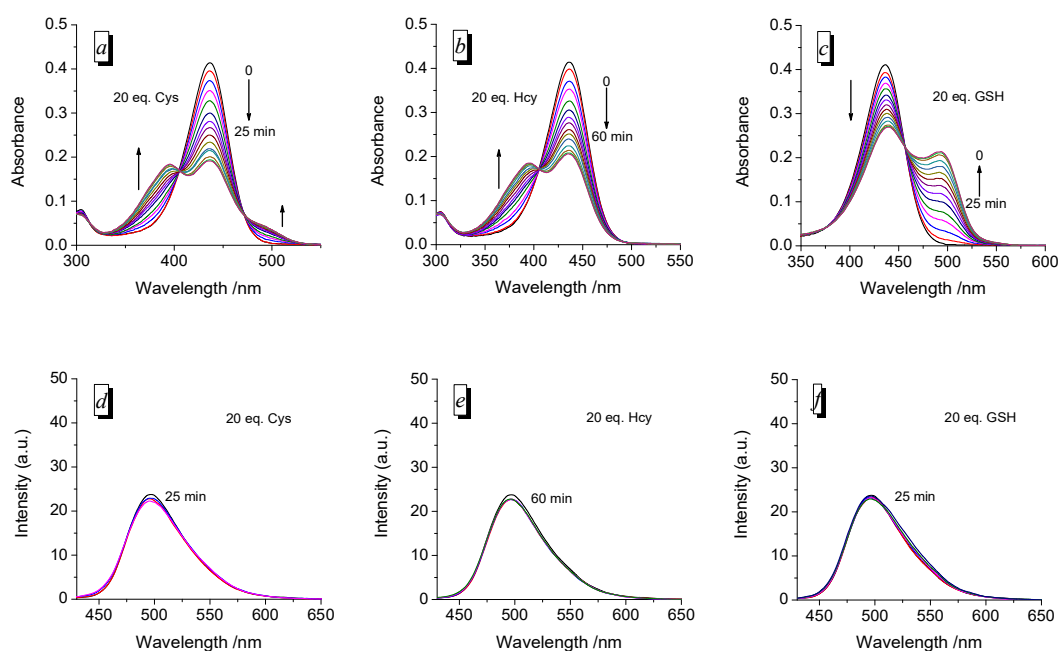

**Figure S1.** Time-dependent absorption spectra (a-c) and fluorescence spectra (d-f) of QB-1 (10 μM) in the presence of 20 equiv of Cys (a, d), Hcy (b, e) and GSH (c, f) in PBS-CH<sub>3</sub>CN (v/v, 3:2, 10 mM, pH 7.4), excited at 405 nm.

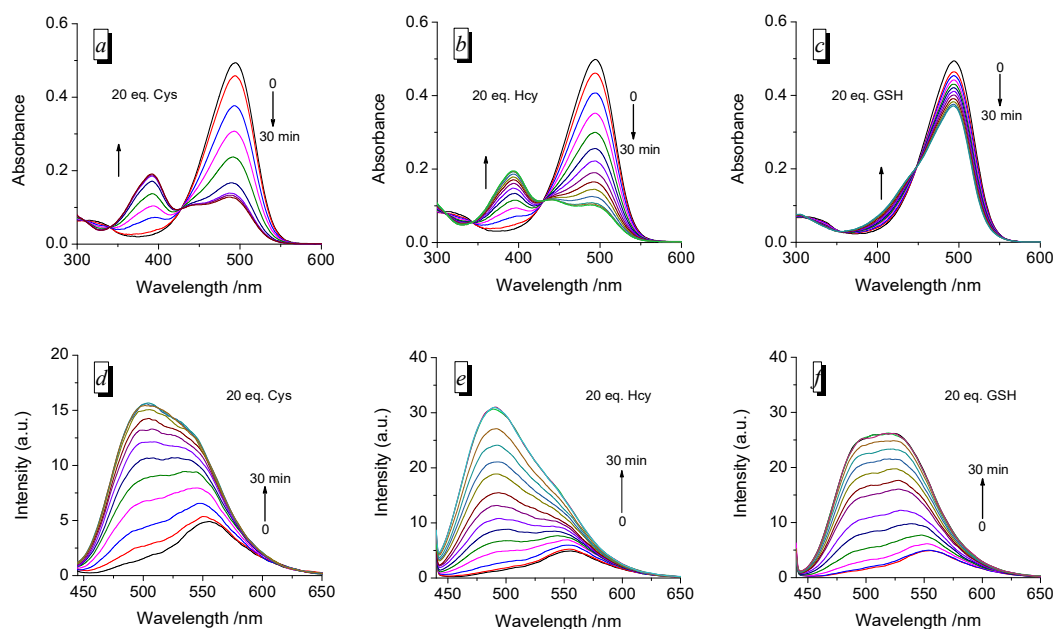

**Figure S2.** Time-dependent absorption spectra (a-c) and fluorescence spectra (d-f) of QB-2 (10 μM) in the presence of 20 equiv of Cys (a, d), Hcy (b, e) and GSH (c, f) in PBS-CH<sub>3</sub>CN (v/v, 3:2, 10 mM, pH 7.4), excited at 430 nm.

### 3. Spectral response of QB-3 toward NAC

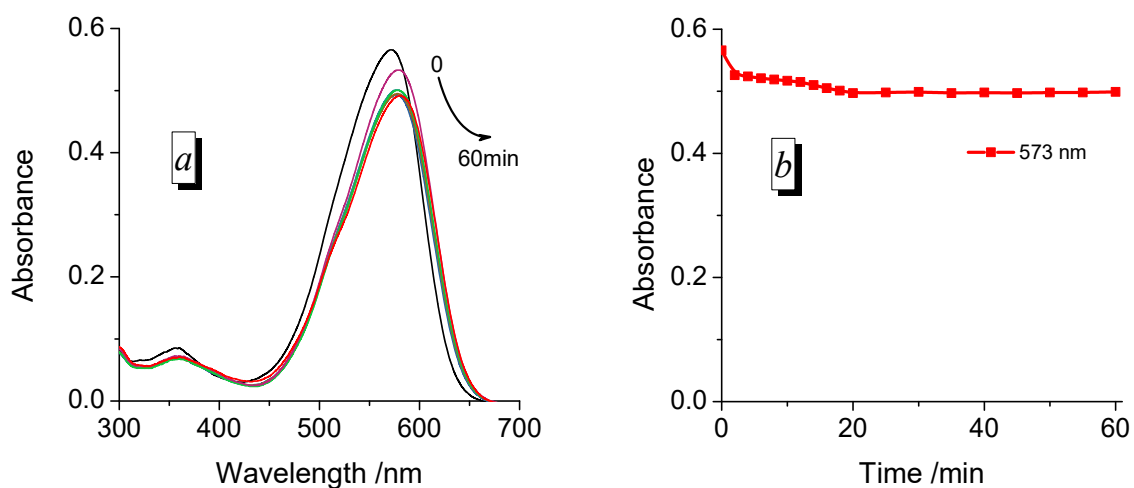

**Figure S3.** (a) Time-dependent absorption spectra of QB-3 (10  $\mu\text{M}$ ) in the presence of 20 equiv of NAC PBS- $\text{CH}_3\text{CN}$  (v/v, 3:2, 10 mM, pH 7.4) and (b) time-dependent absorbance at 573 nm wavelength.

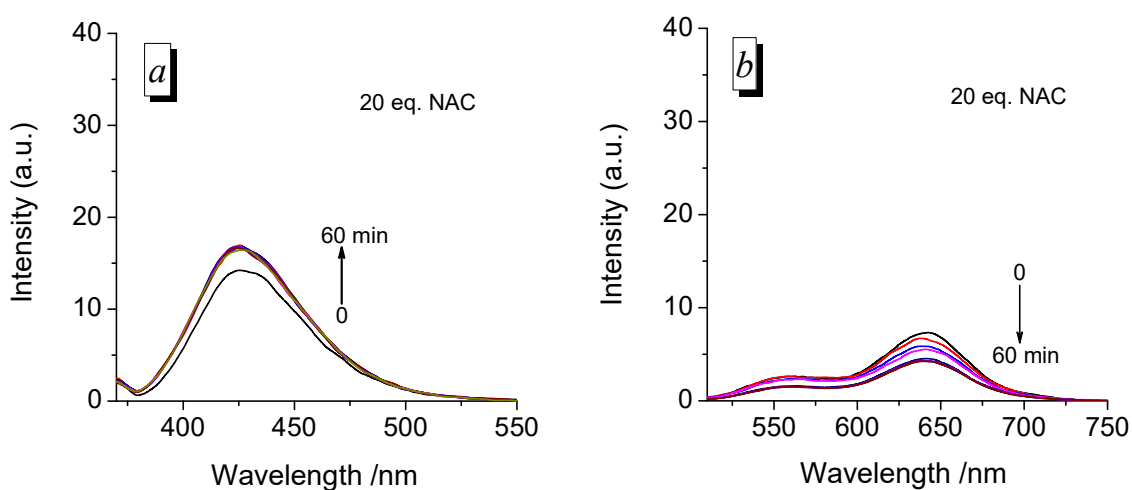

**Figure S4.** (a) Time-dependent fluorescence spectra of QB-3 (10  $\mu\text{M}$ ) in the presence of 20 equiv NAC PBS- $\text{CH}_3\text{CN}$  (v/v, 3:2, 10 mM, pH 7.4), excited at 365 nm and (b) 495 nm.

#### 4. Evidence of the sensing products for QB-3 with Cys/Hcy/GSH

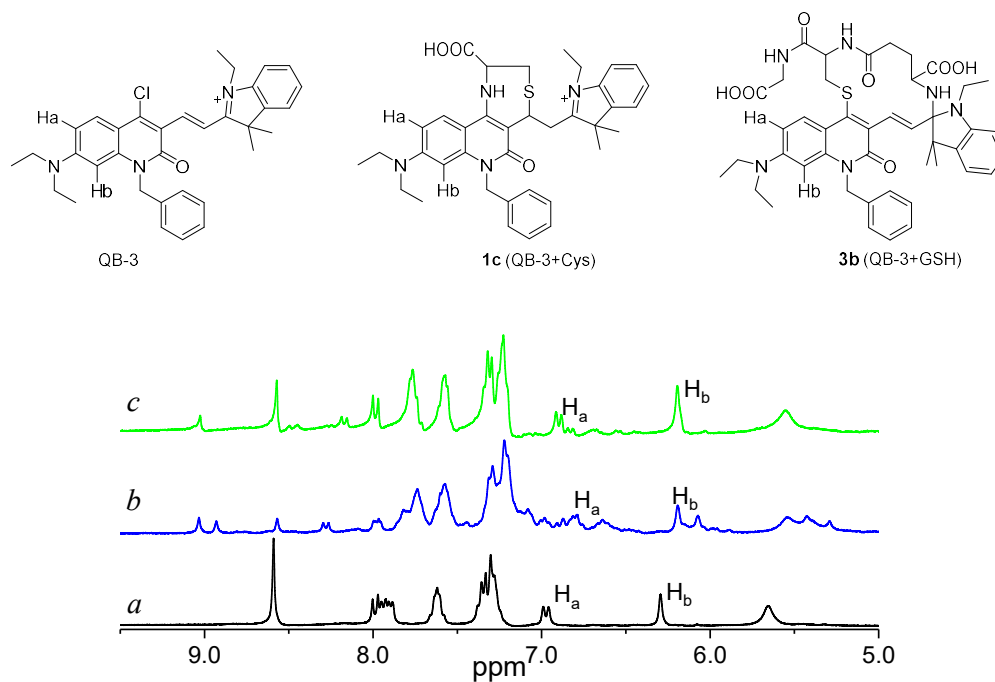

**Figure. S5** Partial <sup>1</sup>H NMR spectra comparison of (a) QB-3, (b) QB-3+Cys and (c) QB-3+GSH. The <sup>1</sup>H NMR spectra of (a) QB-3 was obtained in DMSO-*d*<sub>6</sub>. The <sup>1</sup>H NMR spectra of (b) QB-3+Cys and (c) QB-3+GSH were obtained in DMSO-*d*<sub>6</sub>-D<sub>2</sub>O (3:1, v/v).

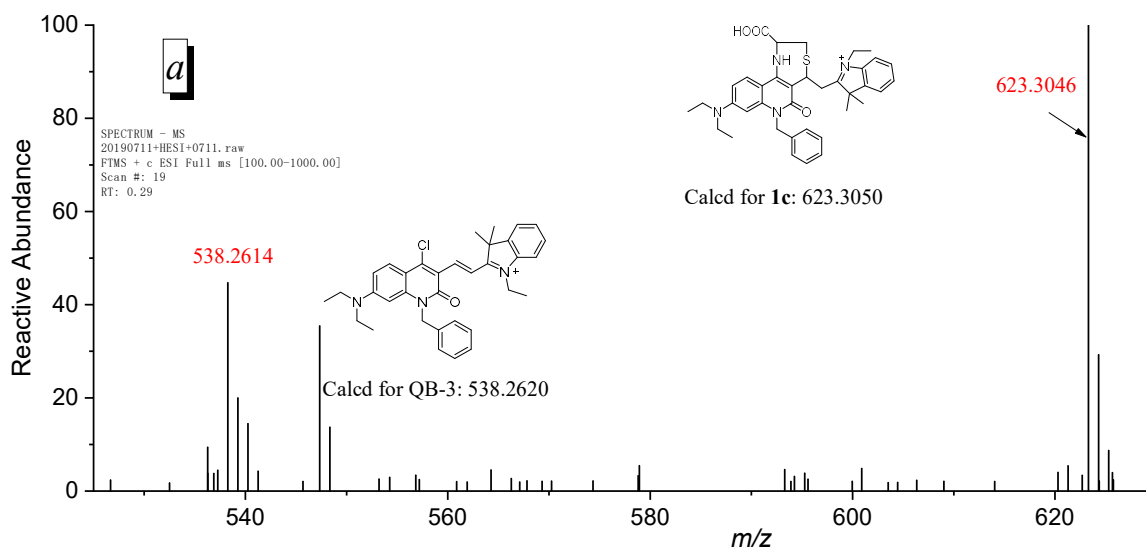

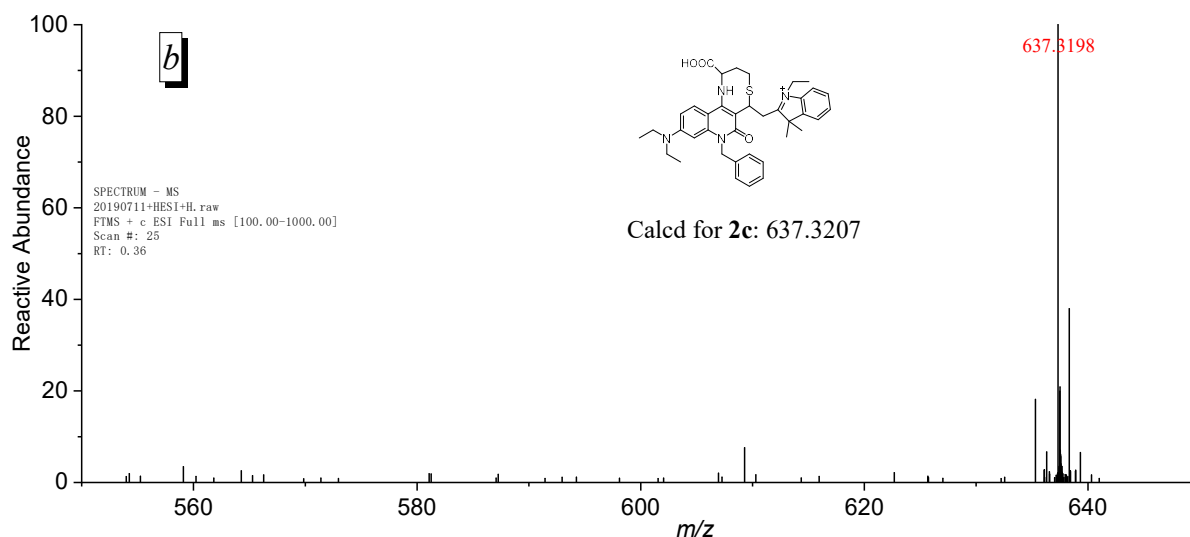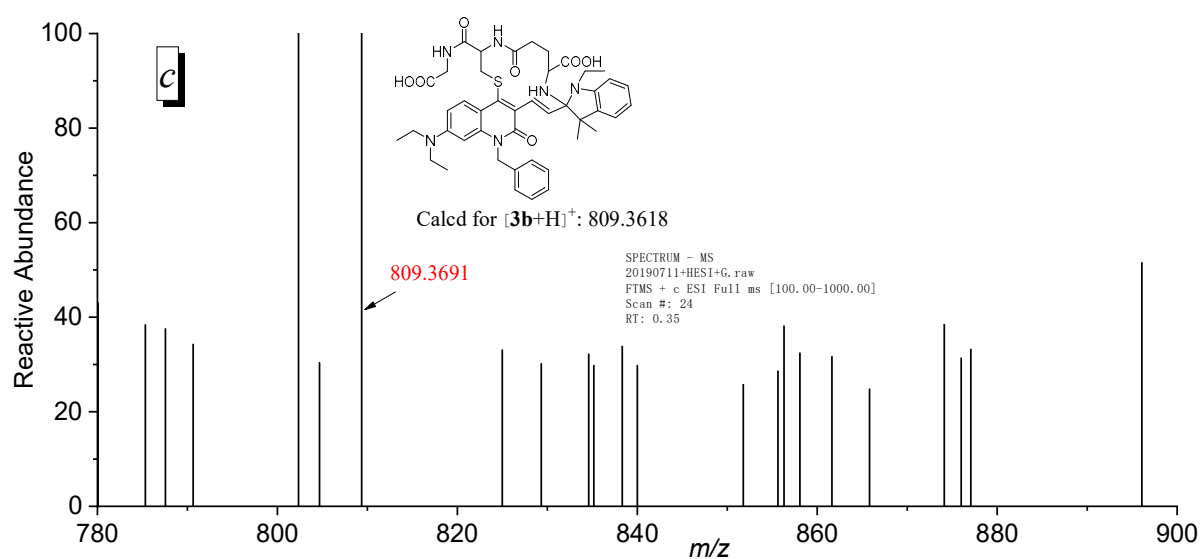

**Figure S6.** High-resolution mass spectrum (HRMS) for the mixture of QB-3 with (a) Cys, (b) Hcy and (c) GSH.

## 5. The selectivity of QB-3 for ions

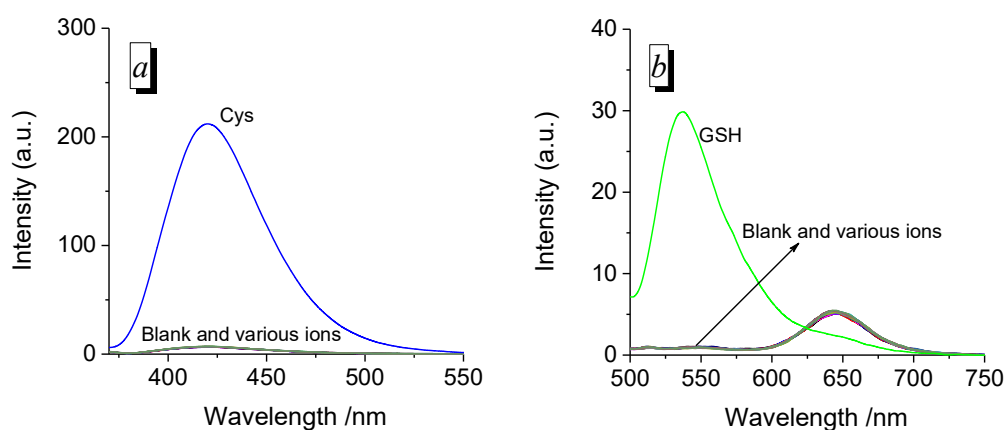

**Figure S7.** Fluorescence spectra of 10  $\mu\text{M}$  QB-3 solutions (PBS- $\text{CH}_3\text{CN}$  v/v, 3:2, 10 mM, pH 7.4) in the presence of 25 equiv of various ions with excitation at (a) 365 nm, (b) 495 nm, including:  $\text{Zn}^{2+}$ ,  $\text{Mg}^{2+}$ ,  $\text{Ca}^{2+}$ ,  $\text{Cd}^{2+}$ ,  $\text{Co}^{2+}$ ,  $\text{Cr}^{3+}$ ,  $\text{Hg}^{2+}$ ,  $\text{Al}^{3+}$ ,  $\text{K}^+$ ,  $\text{Ba}^{2+}$ ,  $\text{I}^-$ ,  $\text{Br}^-$ ,  $\text{Cl}^-$ ,  $\text{SO}_4^{2-}$ ,  $\text{HCO}_3^-$ ,  $\text{HPO}_4^{2-}$ ,  $\text{H}_2\text{PO}_4^-$ ,  $\text{ClO}^-$ ,  $\text{CH}_3\text{COO}^-$ ,  $\text{NO}_3^-$ .

## 6. Competitive reaction between two biothiols (Cys/GSH) with QB-3

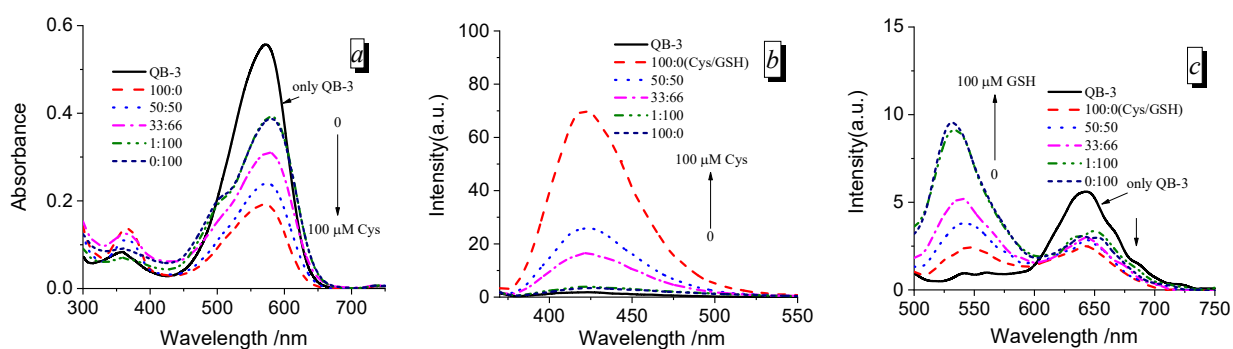

**Figure S8.** UV/Vis absorption spectra (a) and fluorescence spectra (b, c) of QB-3 (10  $\mu\text{M}$ ) after additions of two ratio of biothiols (Cys/GSH,  $\mu\text{M}/\mu\text{M}$ ) of 100:0, 50:50, 33:66, 1:100 and 100:0 for 50 min in PBS/ $\text{CH}_3\text{CN}$  (v/v, 3:2, 10 mM, pH 7.4), excited at 365 nm (b) and 495 nm (c).

## 7. pH effects and cytotoxicity

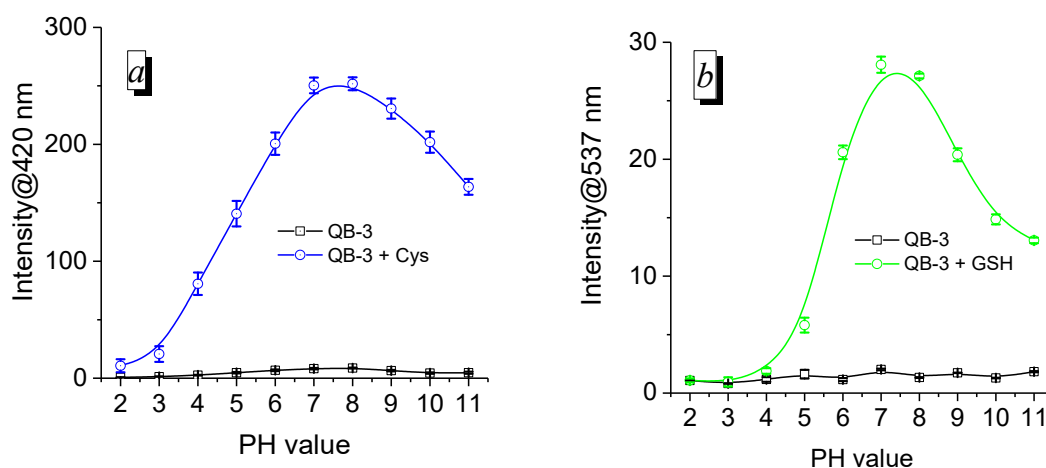

**Figure S9.** Fluorescence intensities of 10  $\mu\text{M}$  QB-3 and its reaction mixture with 200  $\mu\text{M}$  Cys (a) and GSH (b) in PBS buffer solutions (pH 2–11).

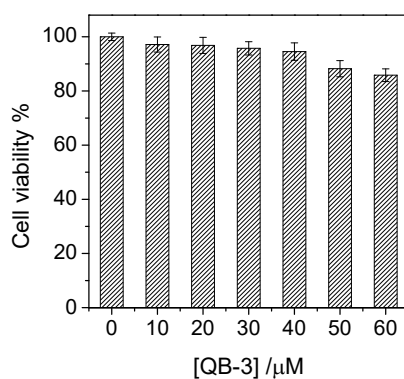

**Figure S10.** MTT assay of HepG2 cells in the presence of different concentrations of QB-3 incubated for 24 h.



## 8. Copies of NMR spectra for compounds

$^1\text{H}$  NMR of **2** in  $\text{CDCl}_3$ , 400 MHz

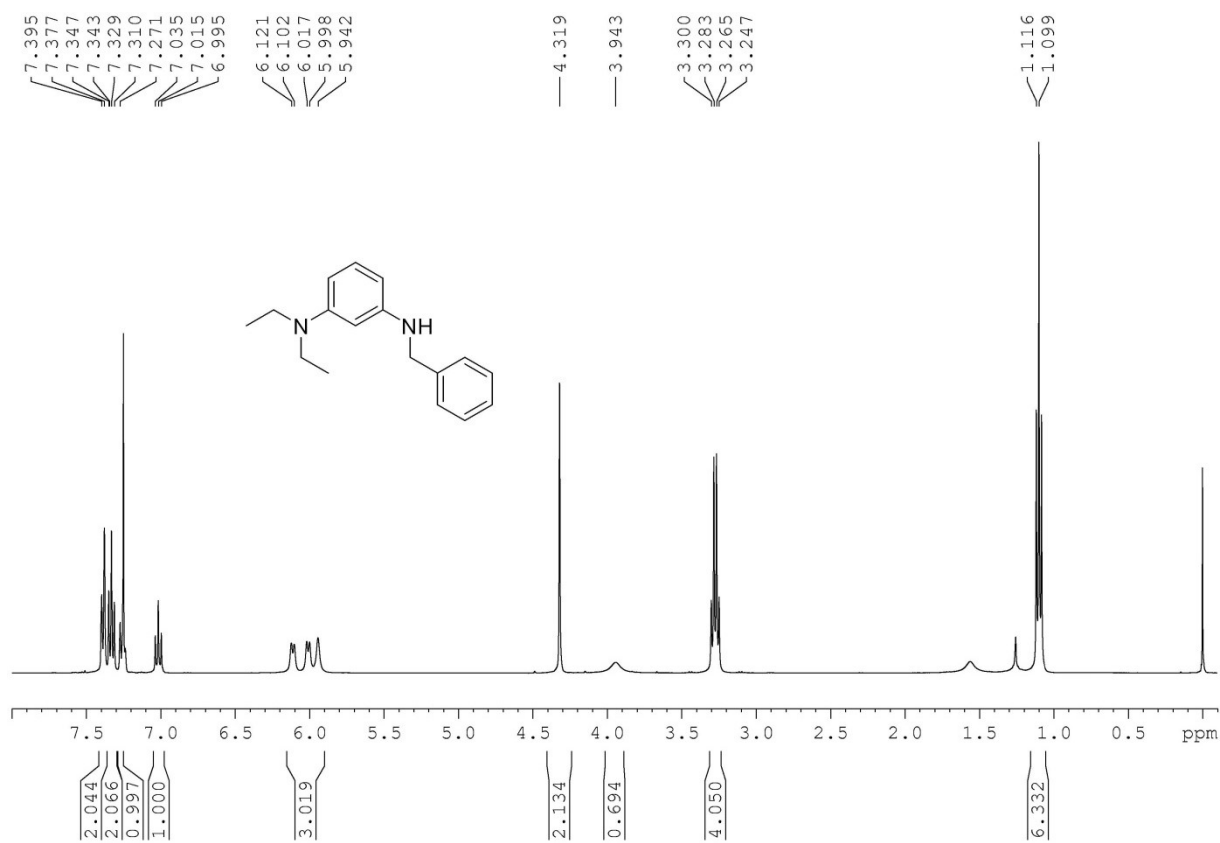

$^{13}\text{C}$  NMR of **2** in  $\text{CDCl}_3$ , 100 MHz

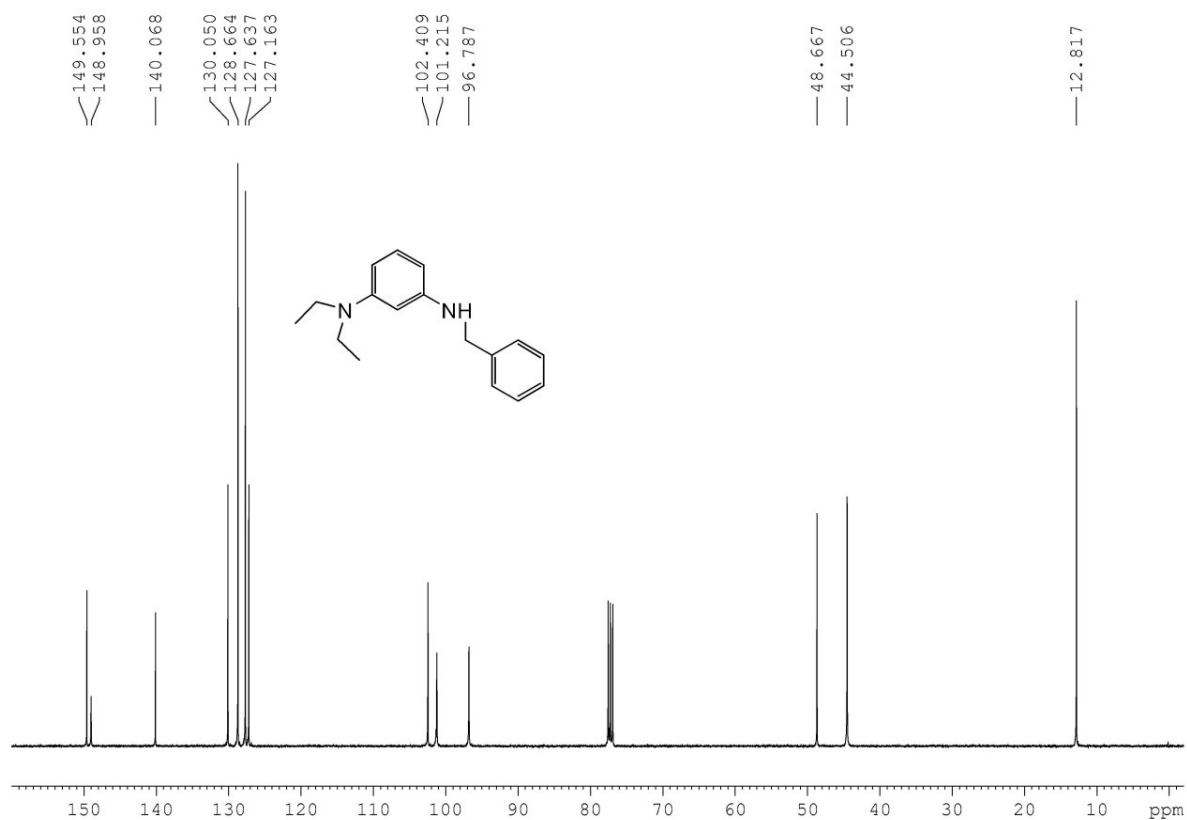

$^1\text{H}$  NMR of **3** in  $\text{DMSO-}d_6$ , 400 MHz

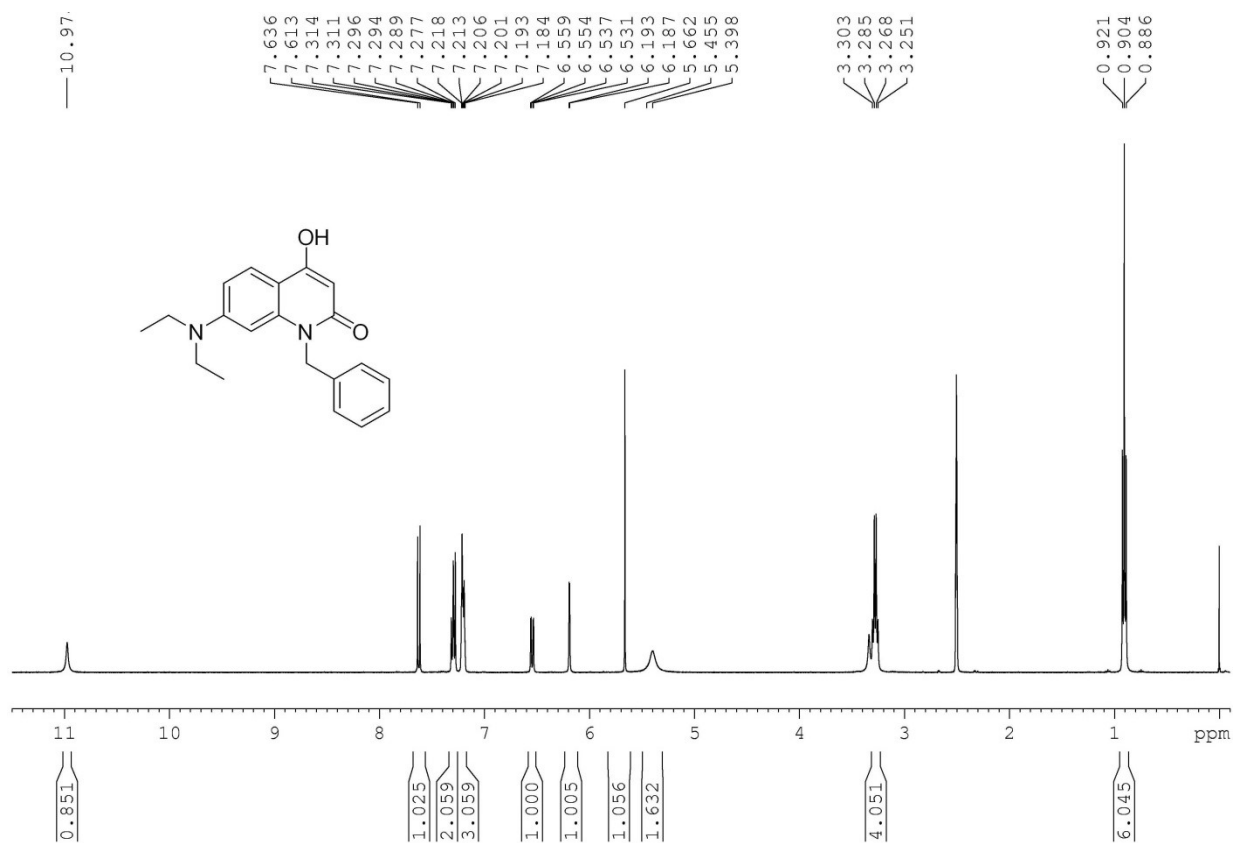

$^{13}\text{C}$  NMR of **3** in  $\text{DMSO-}d_6$ , 100 MHz

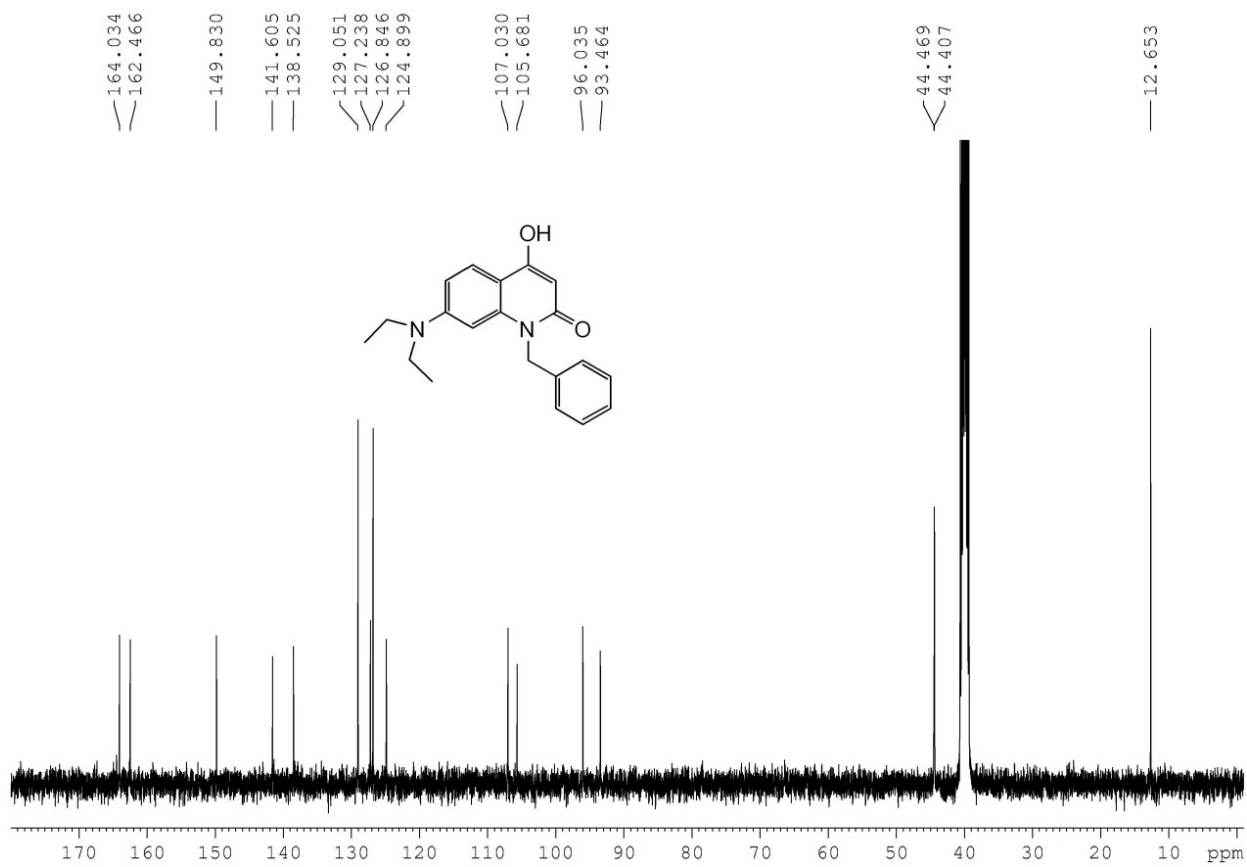

$^1\text{H}$  NMR of QB-1 in  $\text{CDCl}_3$ , 400 MHz

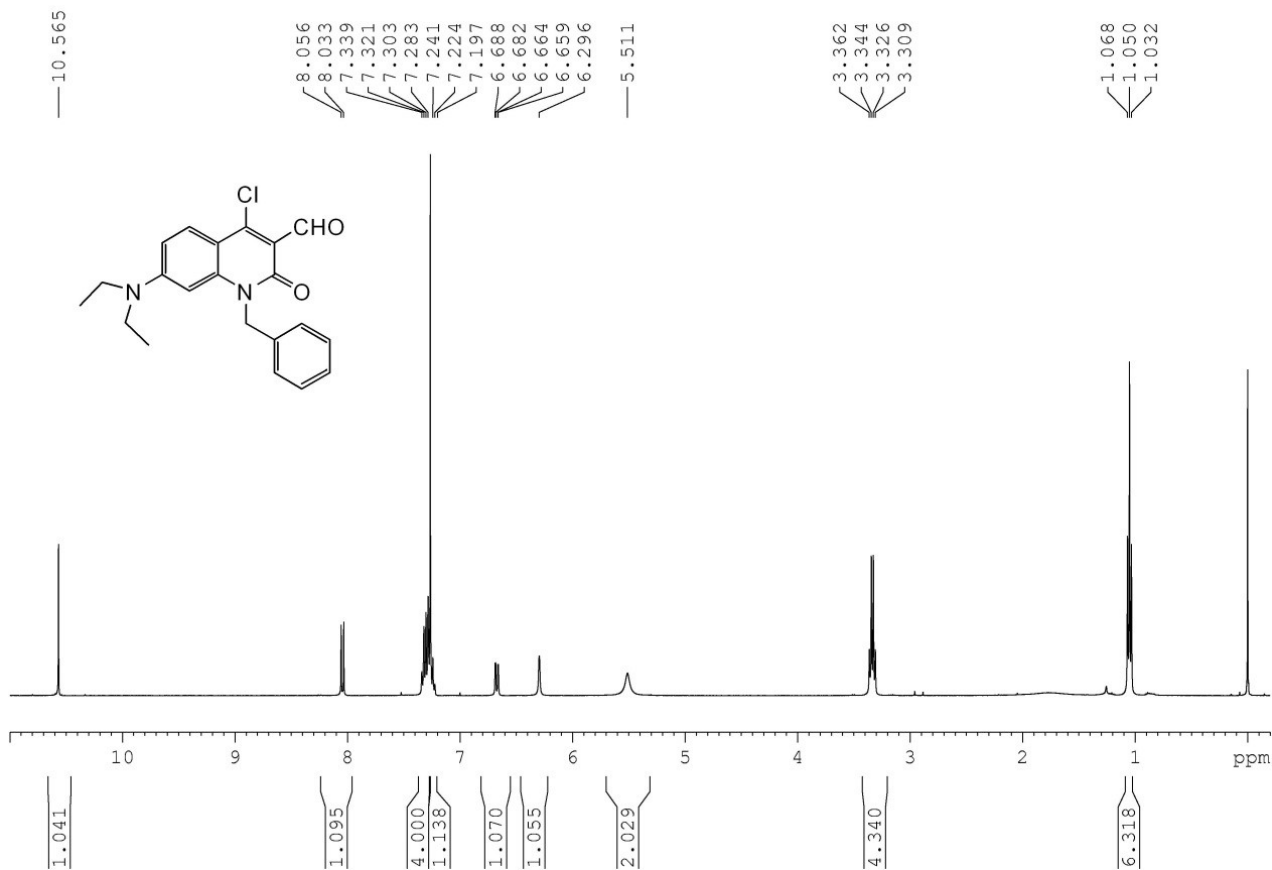

$^{13}\text{C}$  NMR of QB-1 in  $\text{CDCl}_3$ , 100 MHz

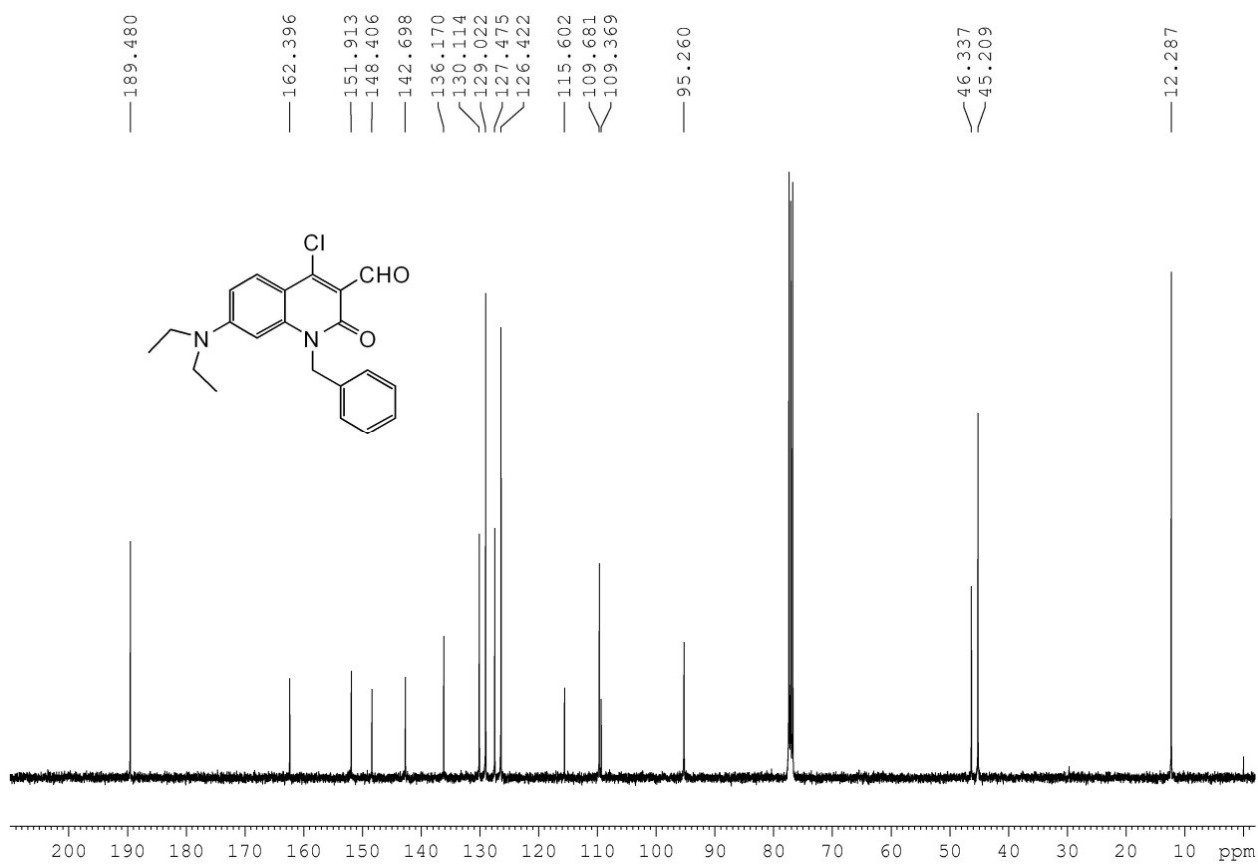

<sup>1</sup>H NMR of QB-2 in CDCl<sub>3</sub>, 400 MHz

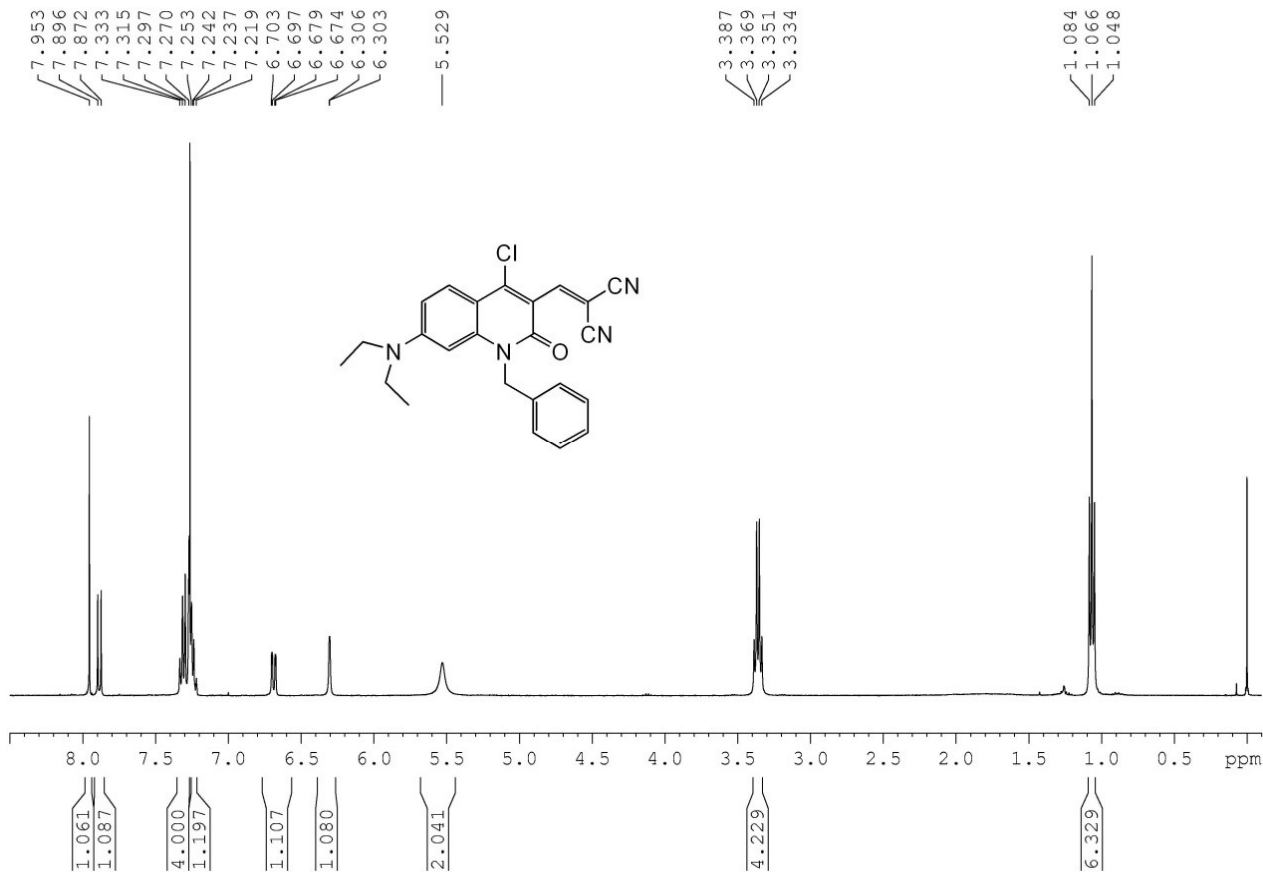

<sup>13</sup>C NMR of QB-2 in CDCl<sub>3</sub>, 100 MHz

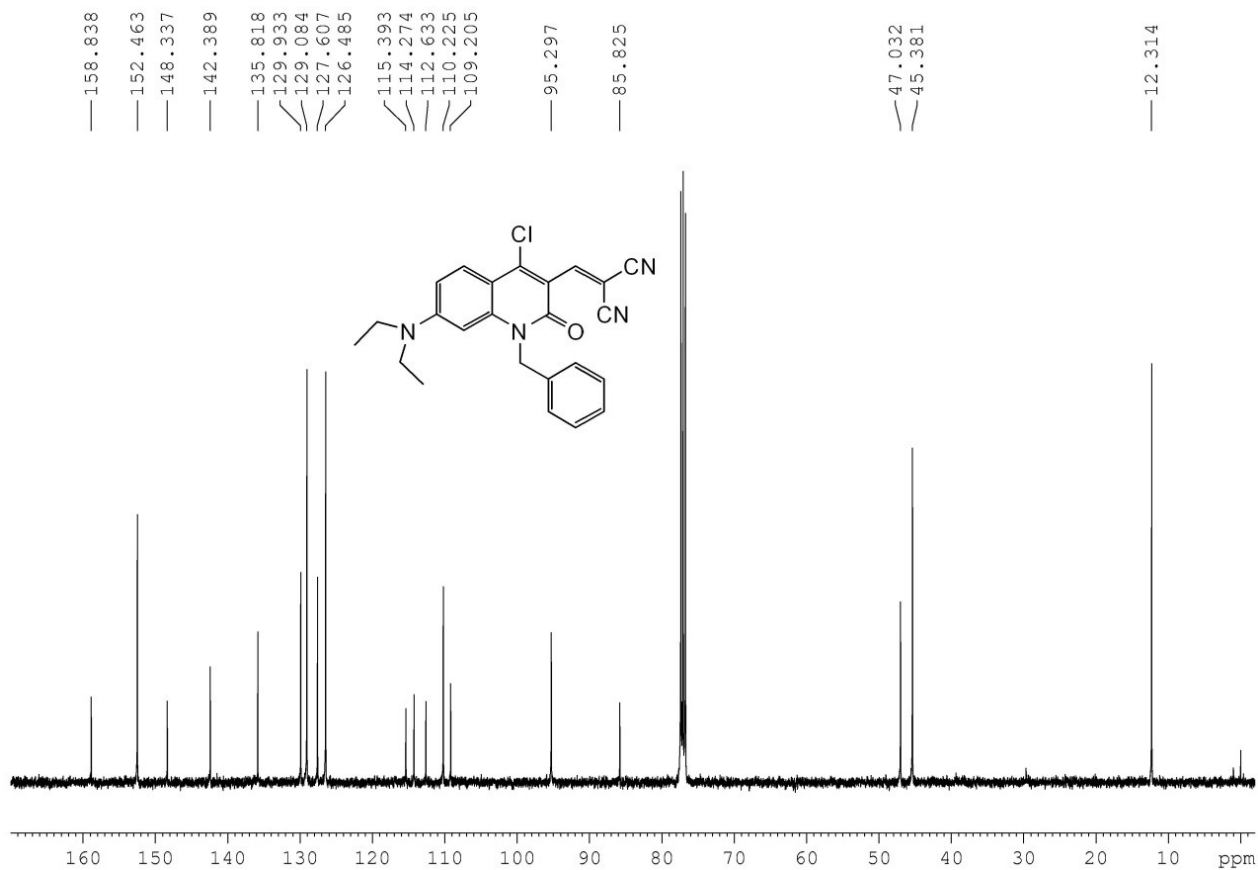

<sup>1</sup>H NMR of QB-3 in DMSO-*d*<sub>6</sub>, 400 MHz

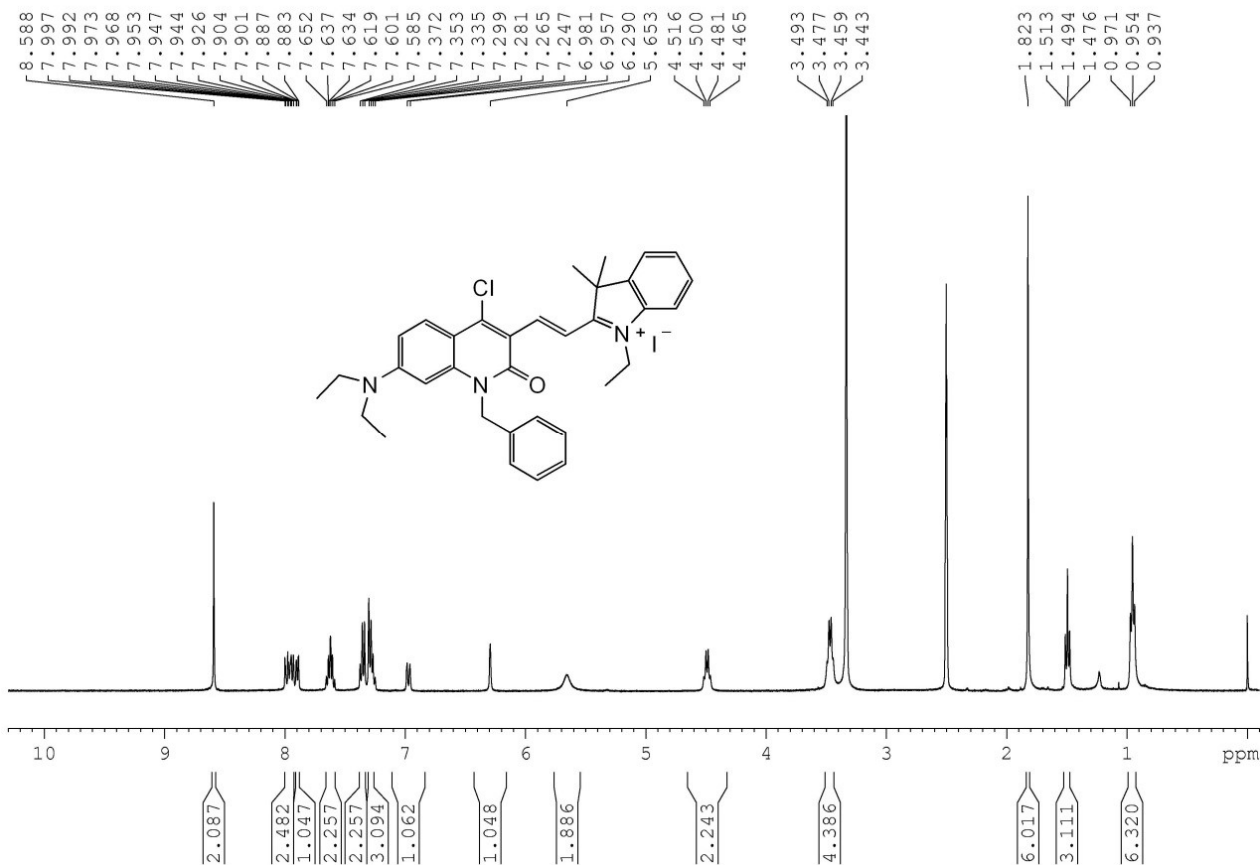

<sup>13</sup>C NMR of QB-3 in DMSO-*d*<sub>6</sub>, 100 MHz

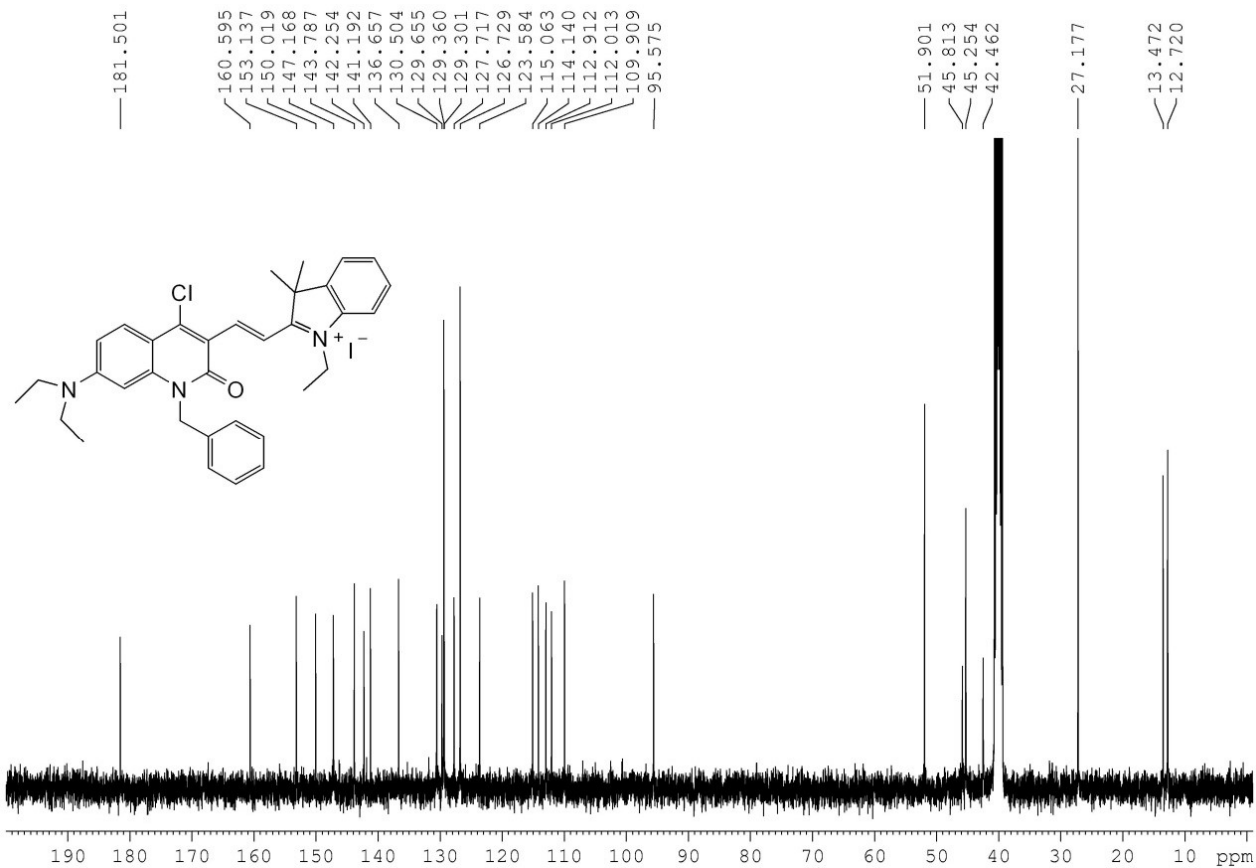

Supplement: d0nj03274c1.pdf [file d0nj03274c1.pdf]
